# Supplementary material for: Organoid-derived C-Kit+/SSEA4− human retinal progenitor cells promote a protective retinal microenvironment during transplantation in rodents
Source: PubMed Central journal article supplement (PMC6418223; doi:10.1038/s41467-019-08961-0), 2019-03-14
Supplement: 41467_2019_8961_MOESM2_ESM.pdf [file 41467_2019_8961_MOESM2_ESM.pdf]

## **Description of Additional Supplementary Files**

### **Supplementary Data 1.**

Averaged fragments per kilobase of exon per million fragments mapped (FPKM) value of genes in 30D, 45D, and 60D C-Kit<sup>+</sup> cells as well as hRPCs.

### **Supplementary Data 2.**

List of immune and inflammation-related genes differentially expressed between 30D C-Kit<sup>+</sup> cells and hRPCs.

### **Supplementary Data 3.**

KEGG pathway analysis of differentially expressed genes between 30D C-Kit<sup>+</sup> cells and hRPCs.

### **Supplementary Data 4.**

Primers used in RT-PCR.
